# Supplementary material for: Supplemented Infant Formula and Human Breast Milk Show Similar Patterns in Modulating Infant Microbiota Composition and Function In Vitro
Source: MDPI journal article supplement (doi:10.3390/ijms25031806), 2024-02-02
Supplement: s1 [file s1]

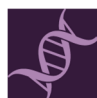

Supplementary Table S1. Average relative abundance of genera in each treatment at each timepoint and the prevalence of the genus in the sample pool (N=36)

| Genus                                 | TEST FORMULA (RA) |         |        |          | BASE FORMULA (RA) |          |        |          | BREAS TMILK (RA) |          |          |          | Positive samples (n; N=36) | Positive Samples (%) |
|---------------------------------------|-------------------|---------|--------|----------|-------------------|----------|--------|----------|------------------|----------|----------|----------|----------------------------|----------------------|
|                                       | T=0h              | T=6h    | T=24h  | T=48h    | T=0h              | T=6h     | T=24h  | T=48h    | T=0h             | T=6h     | T=24h    | T=48h    |                            |                      |
| <i>Streptococcus</i>                  | 0,3788            | 0,6373  | 0,6351 | 0,0368   | 0,2103            | 0,4586   | 0,5151 | 0,4799   | 0,3865           | 0,6775   | 0,6233   | 0,0465   | 36                         | 100                  |
| <i>Raoultella</i>                     | 0,2119            | 0,0680  | 0,0487 | 0,0351   | 0,2723            | 0,1695   | 0,1152 | 0,1019   | 0,3897           | 0,2223   | 0,1474   | 0,0444   | 36                         | 100                  |
| <i>Enterococcus</i>                   | 0,1942            | 0,0850  | 0,0883 | 0,2232   | 0,3068            | 0,2081   | 0,1615 | 0,1591   | 0,0424           | 0,0050   | 0,0044   | 0,1898   | 36                         | 100                  |
| <i>Bifidobacterium</i>                | 0,0504            | 0,1580  | 0,1783 | 0,1812   | 0,0426            | 0,0553   | 0,1392 | 0,1806   | 0,0686           | 0,0565   | 0,1991   | 0,2857   | 36                         | 100                  |
| <i>Escherichia-Shigella</i>           | 0,0383            | 0,0113  | 0,0080 | 0,1237   | 0,0422            | 0,0277   | 0,0195 | 0,0193   | 0,0280           | 0,0132   | 0,0068   | 0,1126   | 36                         | 100                  |
| <i>Actinomyces</i>                    | 0,0631            | 0,0102  | 0,0117 | 0,2207   | 0,0474            | 0,0175   | 0,0113 | 0,0098   | 0,0183           | 0,0002   | 0,0001   | 0,1007   | 33                         | 92                   |
| <i>Klebsiella</i>                     | 0,0235            | 0,0078  | 0,0061 | 0,0123   | 0,0221            | 0,0126   | 0,0092 | 0,0083   | 0,0452           | 0,0180   | 0,0111   | 0,0171   | 36                         | 100                  |
| <i>Anaeroglobus</i>                   | 0,0009            | 0       | 0      | 0,0103   | 0,0002            | 0        | 0      | 0        | 0,0028           | 0        | 0        | 0,0547   | 14                         | 39                   |
| <i>Clostridium sensu stricto 1</i>    | 0,0204            | 0,0086  | 0,0053 | 0,0153   | 0,0382            | 0,0364   | 0,0089 | 0,0114   | 0,0032           | 0,0001   | 0,0002   | 0,0330   | 33                         | 92                   |
| <i>Citrobacter</i>                    | 0,0049            | 0,0022  | 0,0016 | 0,0003   | 0,0064            | 0,0047   | 0,0035 | 0,0034   | 0,0093           | 0,0052   | 0,0038   | 0,0006   | 35                         | 97                   |
| <i>Veillonella</i>                    | 0,0057            | 0,0013  | 0,0023 | 0,0548   | 0,0044            | 0,0039   | 0,0032 | 0,0025   | 0,0008           | 0        | 0        | 0,0325   | 30                         | 83                   |
| <i>Lacticaeibacillus</i>              | 0,0004            | 0,0035  | 0,0056 | 0,0024   | 0,0003            | 0,0007   | 0,0039 | 0,0105   | 0,0011           | 0,0009   | 0,0028   | 0,0087   | 33                         | 92                   |
| <i>Ruminococcaceae Incertae Sedis</i> | 0,0023            | 0       | 0      | 0,0174   | 0,0017            | 0,0003   | 0,0002 | 0,0000   | 0,0003           | 0        | 0        | 0,0153   | 18                         | 50                   |
| <i>Anaerotruncus</i>                  | 0,0008            | 6,2E-05 | 0      | 0,0128   | 0,0007            | 0        | 0      | 0        | 0,0003           | 0        | 0        | 0,0021   | 14                         | 39                   |
| <i>Lachnospirillum</i>                | 0,0005            | 0       | 0      | 0,0083   | 0,0002            | 3,84E-05 | 0      | 0        | 0                | 0        | 0        | 0,0063   | 11                         | 31                   |
| <i>Enterobacter</i>                   | 0,0003            | 0,0005  | 0,0001 | 0,0008   | 0,0002            | 3,84E-05 | 0,0002 | 3,22E-05 | 0,0005           | 0,0003   | 0,0001   | 0,0005   | 29                         | 81                   |
| <i>Erysipelatoclostridium</i>         | 0,0008            | 3,1E-05 | 0      | 0,0236   | 0,0009            | 0        | 0      | 0        | 0                | 0        | 0        | 0,0139   | 13                         | 36                   |
| <i>Schleiferlactobacillus</i>         | 0,0005            | 0,0003  | 0,0023 | 0,0052   | 0,0001            | 3,84E-05 | 0,0003 | 0,0010   | 0,0013           | 0        | 0        | 0,0105   | 21                         | 58                   |
| <i>Lactobacillales Order</i>          | 0,0008            | 0,0016  | 0,0032 | 0,0003   | 0,0008            | 0,0018   | 0,0053 | 0,0072   | 0,0004           | 0,0001   | 0,0003   | 0,0002   | 36                         | 100                  |
| <i>Unknown Genus</i>                  | 0,0003            | 0,0002  | 0,0005 | 0,0007   | 0,0003            | 0,0001   | 0,0005 | 0,0018   | 0,0002           | 0        | 0        | 0,0010   | 28                         | 78                   |
| <i>Enterococcaceae Family</i>         | 0,0002            | 0       | 0      | 0,0004   | 0                 | 0        | 0      | 0        | 9,08E-05         | 0        | 0        | 0,0006   | 8                          | 22                   |
| <i>Unknown Genus</i>                  | 0,0003            | 0,0002  | 0,0001 | 0        | 0,0003            | 0,0003   | 0,0002 | 0,0005   | 0,0004           | 0,0005   | 0,0004   | 0,0001   | 28                         | 78                   |
| <i>Flavonifractor</i>                 | 0,0001            | 0       | 0      | 0        | 0                 | 0        | 0      | 0        | 0                | 0        | 0        | 0,0000   | 3                          | 8                    |
| <i>Enterobacteriaceae</i>             | 0,0000            | 0,0013  | 0,0023 | 3,62E-05 | 0                 | 0,0004   | 0,0014 | 0,0016   | 9,73E-05         | 0        | 0,0003   | 0,0001   | 23                         | 64                   |
| <i>Family Unknown Genus</i>           | 0,0003            | 0       | 0      | 0,0034   | 0,0001            | 0        | 0      | 0        | 0                | 0        | 0        | 0,0012   | 9                          | 25                   |
| <i>Erwinniaceae Family</i>            | 0,0000            | 0       | 0      | 0,0003   | 0                 | 3,84E-05 | 0      | 0        | 0                | 0        | 0        | 0        | 3                          | 8                    |
| <i>Unknown Genus</i>                  | 0                 | 0       | 0      | 0,0035   | 0                 | 0        | 0      | 0        | 9,08E-05         | 0        | 0        | 0,0117   | 7                          | 19                   |
| <i>Lactobacillaceae Family</i>        | 0                 | 0       | 0      | 0,0008   | 0                 | 0        | 0      | 0        | 0                | 0        | 0        | 0,0029   | 6                          | 17                   |
| <i>Unknown Genus</i>                  | 0                 | 0       | 0      | 0,0029   | 0                 | 0        | 0      | 0        | 6,51E-05         | 0        | 0        | 0,0002   | 7                          | 19                   |
| <i>Staphylococcus</i>                 | 0                 | 0       | 0      | 0,0004   | 0                 | 0        | 0      | 0        | 0,0001           | 0        | 0        | 0,0018   | 8                          | 22                   |
| <i>Parasutterella</i>                 | 0                 | 0       | 0      | 0,0002   | 0                 | 0        | 0      | 0        | 0                | 0        | 0        | 0        | 2                          | 6                    |
| <i>Lactococcus</i>                    | 0                 | 0       | 0      | 0,0002   | 0                 | 0        | 0      | 0        | 0                | 0        | 0        | 0,0005   | 4                          | 11                   |
| <i>Eggerthella</i>                    | 0                 | 0       | 0      | 0,0002   | 0                 | 0        | 0      | 0        | 9,08E-05         | 0        | 0        | 0,0009   | 5                          | 14                   |
| <i>Erysipelatoclostridiaceae</i>      | 0                 | 0       | 0      | 0,0003   | 0                 | 0        | 0      | 0        | 0                | 0        | 0        | 0,0012   | 7                          | 19                   |
| <i>Family Unknown Genus</i>           | 0                 | 0       | 0      | 0,0009   | 7,44E-05          | 0        | 0      | 0        | 0                | 0        | 0        | 0,0002   | 6                          | 17                   |
| <i>Haemophilus</i>                    | 0                 | 0       | 0      | 0,0004   | 0                 | 0        | 0      | 0        | 0                | 2,83E-05 | 0        | 0        | 6                          | 17                   |
| <i>Rothia</i>                         | 0                 | 0       | 0      | 0,0002   | 0                 | 0        | 0      | 0        | 0                | 0        | 0        | 0        | 2                          | 6                    |
| <i>Varibaculum</i>                    | 0                 | 0       | 0      | 0,0002   | 0                 | 0        | 0      | 0        | 0                | 0        | 0        | 0        | 2                          | 6                    |
| <i>Bacteria Kingdom</i>               | 0                 | 0       | 0      | 3,14E-05 | 3,47E-05          | 0        | 0      | 0        | 0                | 5,67E-05 | 1,31E-05 | 2,98E-05 | 8                          | 22                   |
| <i>Unknown Genus</i>                  | 0                 | 0,0024  | 0,0005 | 0        | 0                 | 0,0010   | 0,0012 | 0,0017   | 3,03E-05         | 0        | 0,42E-05 | 0        | 11                         | 31                   |
| <i>HT002</i>                          | 0                 | 0,0004  | 0      | 0        | 0                 | 0,0003   | 0      | 0        | 0                | 0        | 0        | 0        | 2                          | 6                    |
| <i>Limosilactobacillus</i>            | 0                 | 0,0004  | 0      | 0        | 0                 | 0,0003   | 0      | 0        | 0                | 0        | 0        | 0        | 2                          | 6                    |

|                                           |           |           |           |           |           |           |           |           |           |           |           |           |          |    |
|-------------------------------------------|-----------|-----------|-----------|-----------|-----------|-----------|-----------|-----------|-----------|-----------|-----------|-----------|----------|----|
| <i>Paenibacillus</i>                      | 0         | 0         | 0         | 0,0003    | 3,72E-05  | 0         | 0         | 0         | 0         | 0         | 0         | 0         | 3        | 8  |
| <i>Aquabacterium</i>                      | 0         | 0         | 0         | 6,08E-05  | 6,94E-05  | 0         | 0         | 0         | 0         | 0         | 0         | 0         | 2        | 6  |
| <i>Fusobacterium</i>                      | 0         | 0         | 0         | 9,12E-05  | 0         | 0         | 0         | 0         | 0         | 0         | 0         | 0,0008    | 4        | 11 |
| <i>Methylobacterium</i>                   | 0         | 0         | 0         | 0,0003    | 0         | 0         | 0         | 0         | 0         | 0         | 0         | 0         | 1        | 3  |
| <i>Enterobacteriaceae</i> Order           | 0         | 0         | 0         | 0         | 0         | 7,24E-05  | 0         | 4,67E-05  | 0         | 0         | 0         | 1,31E-05  | 2,87E-05 | 14 |
| Unknown Genus                             | 0         | 0         | 0         | 0         | 0         | 0         | 0         | 0         | 0         | 0         | 0         | 0         | 5        | 8  |
| <i>Bacillus</i>                           | 0         | 0         | 0         | 0         | 0,0014    | 0,0005    | 0         | 0         | 0         | 0         | 0         | 0         | 3        | 8  |
| <i>Bacilli</i> Class Unknown Genus        | 0         | 0         | 0         | 0         | 3,47E-05  | 0         | 0         | 0         | 0         | 0         | 0         | 3,16E-05  | 2        | 6  |
| <i>Clostridium sensu stricto</i> 18       | 0         | 0         | 0         | 0         | 0         | 0         | 0         | 0         | 0         | 0         | 0         | 0,0012    | 3        | 8  |
| <i>Actinobacteria</i> Class Unknown Genus | 0         | 0         | 0         | 0         | 0         | 0         | 0         | 0         | 0         | 0         | 0         | 2,98E-05  | 1        | 3  |
| <i>Enhydrobacter</i>                      | 0         | 0         | 0         | 0         | 0         | 0         | 0         | 0         | 0         | 0         | 0         | 9,48E-05  | 1        | 3  |
| <b>Observed Number of Genera</b>          | <b>26</b> | <b>21</b> | <b>18</b> | <b>39</b> | <b>28</b> | <b>25</b> | <b>19</b> | <b>20</b> | <b>26</b> | <b>15</b> | <b>17</b> | <b>40</b> |          |    |

Supplementary Table S2: Differentially abundant genus level taxa as identified using Kruskal-Wallis test and their average relative abundance in each treatment. F-test formula, B-base formula, BM-breast milk.

| Genus                                     | T=0h       |       |             |         |      |      | T=12h      |       |             |         |      |      | T=24h      |       |             |         |      |      | T=48h      |       |             |         |      |      |
|-------------------------------------------|------------|-------|-------------|---------|------|------|------------|-------|-------------|---------|------|------|------------|-------|-------------|---------|------|------|------------|-------|-------------|---------|------|------|
|                                           | Average RA |       |             | p-value |      |      | Average RA |       |             | p-value |      |      | Average RA |       |             | p-value |      |      | Average RA |       |             | p-value |      |      |
|                                           | Formula    | Base  | Breast milk | All     | FvBM | FvB  | Formula    | Base  | Breast milk | All     | FvBM | FvB  | Formula    | Base  | Breast milk | All     | FvBM | FvB  | Formula    | Base  | Breast milk | All     | FvBM | FvB  |
| <i>Actinomyces</i>                        | 0,063      | 0,047 | 0,018       | NS      | 0,05 | NS   | 0,010      | 0,018 | 0,000       | NS      | 0,05 | NS   | 0,012      | 0,011 | 0,000       | NS      | 0,05 | NS   | 0,221      | 0,010 | 0,101       | 0,03    | 0,05 | 0,05 |
| <i>Anaeroglobus</i>                       | 0,001      | 0,000 | 0,003       | 0,03    | 0,05 | 0,05 | 0,000      | 0,000 | 0,000       | NS      | NS   | NS   | 0,000      | 0,000 | 0,000       | NS      | NS   | NS   | 0,010      | 0,000 | 0,055       | 0,02    | 0,05 | 0,04 |
| <i>Anaerotruncus</i>                      | 0,001      | 0,001 | 0,000       | NS      | NS   | NS   | 0,000      | 0,000 | 0,000       | NS      | NS   | NS   | 0,000      | 0,000 | 0,000       | NS      | NS   | NS   | 0,013      | 0,000 | 0,002       | 0,02    | 0,05 | 0,04 |
| <i>Bifidobacterium</i>                    | 0,050      | 0,043 | 0,069       | NS      | NS   | NS   | 0,158      | 0,055 | 0,057       | NS      | 0,05 | 0,05 | 0,178      | 0,139 | 0,199       | NS      | NS   | NS   | 0,181      | 0,181 | 0,286       | NS      | 0,05 | NS   |
| <i>Citrobacter</i>                        | 0,005      | 0,006 | 0,009       | 0,03    | 0,05 | 0,05 | 0,002      | 0,005 | 0,005       | NS      | 0,05 | NS   | 0,002      | 0,003 | 0,004       | NS      | 0,05 | 0,05 | 0,000      | 0,003 | 0,001       | NS      | NS   | 0,05 |
| <i>Clostridium sensu stricto</i> 1        | 0,020      | 0,038 | 0,003       | 0,04    | 0,05 | NS   | 0,009      | 0,036 | 0,000       | 0,03    | 0,05 | 0,05 | 0,005      | 0,009 | 0,000       | 0,04    | 0,05 | NS   | 0,015      | 0,011 | 0,033       | NS      | 0,05 | NS   |
| <i>Clostridium sensu stricto</i> 18       | 0,000      | 0,000 | 0,000       | NS      | NS   | NS   | 0,000      | 0,000 | 0,000       | NS      | NS   | NS   | 0,000      | 0,000 | 0,000       | NS      | NS   | NS   | 0,000      | 0,000 | 0,001       | 0,02    | 0,04 | NS   |
| <i>f_Enterobacteriaceae_g_Unknown</i>     | 0,000      | 0,000 | 0,000       | NS      | NS   | NS   | 0,000      | 0,000 | 0,000       | NS      | NS   | NS   | 0,000      | 0,000 | 0,000       | NS      | 0,05 | NS   | 0,000      | 0,000 | 0,000       | NS      | NS   | NS   |
| <i>f_Enterococcaceae_g_Unknown</i>        | 0,000      | 0,000 | 0,000       | NS      | NS   | NS   | 0,000      | 0,000 | 0,000       | NS      | NS   | NS   | 0,000      | 0,001 | 0,000       | NS      | 0,04 | NS   | 0,001      | 0,002 | 0,001       | NS      | NS   | NS   |
| <i>Enterobacter</i>                       | 0,000      | 0,000 | 0,001       | 0,03    | 0,05 | 0,05 | 0,000      | 0,000 | 0,000       | NS      | NS   | 0,05 | 0,000      | 0,000 | 0,000       | NS      | NS   | NS   | 0,001      | 0,000 | 0,000       | NS      | NS   | 0,05 |
| <i>Enterococcus</i>                       | 0,194      | 0,307 | 0,042       | NS      | NS   | NS   | 0,085      | 0,208 | 0,005       | 0,03    | 0,05 | 0,05 | 0,088      | 0,162 | 0,004       | 0,03    | 0,05 | 0,05 | 0,223      | 0,159 | 0,190       | NS      | 0,05 | NS   |
| <i>Erysipelatoclostridium</i>             | 0,001      | 0,001 | 0,000       | NS      | 0,04 | NS   | 0,000      | 0,000 | 0,000       | NS      | NS   | NS   | 0,000      | 0,000 | 0,000       | NS      | NS   | NS   | 0,024      | 0,000 | 0,014       | NS      | NS   | 0,04 |
| <i>Escherichia-Shigella</i>               | 0,038      | 0,042 | 0,028       | NS      | 0,05 | NS   | 0,011      | 0,028 | 0,013       | 0,05    | 0,04 | NS   | 0,008      | 0,019 | 0,007       | NS      | NS   | 0,05 | 0,124      | 0,019 | 0,113       | 0,04    | NS   | 0,05 |
| <i>Haemophilus</i>                        | 0,000      | 0,000 | 0,000       | NS      | NS   | NS   | 0,000      | 0,000 | 0,000       | NS      | NS   | NS   | 0,000      | 0,000 | 0,000       | NS      | NS   | NS   | 0,001      | 0,000 | 0,001       | 0,02    | 0,05 | 0,04 |
| <i>Intestinibacter</i>                    | 0,000      | 0,000 | 0,000       | NS      | NS   | NS   | 0,000      | 0,000 | 0,000       | NS      | NS   | NS   | 0,000      | 0,000 | 0,000       | NS      | NS   | NS   | 0,003      | 0,000 | 0,000       | 0,02    | 0,05 | 0,04 |
| <i>Klebsiella</i>                         | 0,023      | 0,022 | 0,045       | NS      | 0,05 | NS   | 0,008      | 0,013 | 0,018       | NS      | 0,05 | NS   | 0,006      | 0,009 | 0,011       | NS      | 0,05 | NS   | 0,012      | 0,008 | 0,017       | NS      | 0,05 | NS   |
| <i>o_Lactobacillales_g_Unknown</i>        | 0,001      | 0,001 | 0,000       | NS      | NS   | NS   | 0,002      | 0,002 | 0,000       | NS      | 0,05 | NS   | 0,003      | 0,005 | 0,000       | NS      | 0,05 | NS   | 0,000      | 0,007 | 0,000       | NS      | NS   | 0,05 |
| <i>Lachnospirillum</i>                    | 0,001      | 0,000 | 0,000       | NS      | NS   | NS   | 0,000      | 0,000 | 0,000       | NS      | NS   | NS   | 0,000      | 0,000 | 0,000       | NS      | NS   | NS   | 0,008      | 0,000 | 0,002       | 0,03    | NS   | 0,04 |
| <i>Lactocaseibacillus</i>                 | 0,000      | 0,000 | 0,001       | NS      | 0,05 | NS   | 0,004      | 0,001 | 0,001       | NS      | 0,05 | NS   | 0,006      | 0,004 | 0,003       | NS      | 0,05 | NS   | 0,002      | 0,010 | 0,009       | 0,05    | 0,05 | NS   |
| <i>f_Lactobacillaceae_g_HT002</i>         | 0,000      | 0,000 | 0,000       | NS      | NS   | NS   | 0,002      | 0,001 | 0,000       | NS      | NS   | NS   | 0,000      | 0,001 | 0,000       | NS      | 0,05 | NS   | 0,000      | 0,002 | 0,000       | NS      | NS   | NS   |
| <i>f_Lactobacillaceae_g_Unknown</i>       | 0,000      | 0,000 | 0,000       | NS      | NS   | NS   | 0,001      | 0,000 | 0,000       | 0,04    | 0,05 | NS   | 0,002      | 0,001 | 0,000       | NS      | 0,05 | NS   | 0,000      | 0,002 | 0,000       | NS      | NS   | 0,05 |
| <i>f_Ruminococcaceae_g_Incertae Sedis</i> | 0,002      | 0,002 | 0,000       | NS      | 0,05 | NS   | 0,000      | 0,000 | 0,000       | NS      | NS   | NS   | 0,000      | 0,000 | 0,000       | NS      | NS   | NS   | 0,017      | 0,000 | 0,015       | 0,05    | NS   | 0,05 |
| <i>Parasutterella</i>                     | 0,000      | 0,000 | 0,000       | NS      | NS   | NS   | 0,000      | 0,000 | 0,000       | NS      | NS   | NS   | 0,000      | 0,000 | 0,000       | NS      | NS   | NS   | 0,000      | 0,000 | 0,044       | 0,02    | 0,05 | 0,04 |
| <i>Raoultella</i>                         | 0,212      | 0,272 | 0,390       | 0,03    | 0,05 | 0,05 | 0,068      | 0,170 | 0,222       | 0,04    | 0,05 | 0,05 | 0,049      | 0,115 | 0,147       | NS      | 0,05 | 0,05 | 0,035      | 0,102 | 0,010       | NS      | NS   | 0,05 |

|                                     |       |       |       |      |      |      |       |       |       |      |      |      |       |       |       |      |      |      |       |       |       |      |      |      |
|-------------------------------------|-------|-------|-------|------|------|------|-------|-------|-------|------|------|------|-------|-------|-------|------|------|------|-------|-------|-------|------|------|------|
| <i>Rothia</i>                       | 0,000 | 0,000 | 0,000 | NS   | NS   | NS   | 0,000 | 0,000 | 0,000 | NS   | NS   | NS   | 0,000 | 0,000 | 0,000 | NS   | NS   | NS   | 0,000 | 0,000 | 0,000 | NS   | NS   | 0,04 |
| <i>[Ruminococcus]_torques_group</i> | 0,000 | 0,000 | 0,000 | NS   | NS   | NS   | 0,000 | 0,000 | 0,000 | NS   | NS   | NS   | 0,000 | 0,000 | 0,000 | NS   | NS   | NS   | 0,001 | 0,000 | 0,003 | 0,02 | 0,05 | 0,04 |
| <i>[Ruminococcus]_gnavus_group</i>  | 0,000 | 0,000 | 0,000 | NS   | NS   | NS   | 0,000 | 0,000 | 0,000 | NS   | NS   | NS   | 0,000 | 0,000 | 0,000 | NS   | NS   | NS   | 0,003 | 0,000 | 0,012 | 0,02 | 0,05 | 0,04 |
| <i>Schleiferilactobacillus</i>      | 0,000 | 0,000 | 0,001 | 0,05 | 0,05 | NS   | 0,000 | 0,000 | 0,000 | NS   | NS   | NS   | 0,002 | 0,000 | 0,000 | 0,03 | 0,04 | 0,05 | 0,005 | 0,001 | 0,001 | 0,03 | 0,05 | 0,05 |
| <i>Staphylococcus</i>               | 0,000 | 0,000 | 0,000 | NS   | NS   | NS   | 0,000 | 0,000 | 0,000 | NS   | NS   | NS   | 0,000 | 0,000 | 0,000 | NS   | NS   | NS   | 0,003 | 0,000 | 0,001 | 0,02 | 0,05 | 0,04 |
| <i>Streptococcus</i>                | 0,379 | 0,210 | 0,387 | NS   | NS   | 0,05 | 0,637 | 0,459 | 0,678 | 0,03 | 0,05 | 0,05 | 0,635 | 0,515 | 0,623 | NS   | NS   | 0,05 | 0,037 | 0,480 | 0,033 | 0,03 | 0,05 | 0,05 |
| <i>Veillonella</i>                  | 0,006 | 0,004 | 0,001 | NS   | 0,05 | NS   | 0,001 | 0,004 | 0,000 | 0,02 | 0,04 | 0,05 | 0,002 | 0,003 | 0,000 | NS   | 0,04 | 0,04 | 0,055 | 0,002 | 0,033 | 0,03 | 0,05 | 0,05 |
| Other                               | 0,000 | 0,002 | 0,000 | NS   | NS   | NS   | 0,000 | 0,001 | 0,000 | NS   | NS   | NS   | 0,000 | 0,000 | 0,000 | NS   | NS   | NS   | 0,002 | 0,000 | 0,022 | NS   | NS   | NS   |
